# Supplementary material
Source: publisher figshare collection journal article supplement (https://springernature.figshare.com/ndownloader/files/16754150)
Supplement: Supplementary file 1 [file 16754150]

## Sheet: Sheet1
Figure/table supported by the data file	Name of data file supporting the figure/table	Data file format	Repository name where the data file resides	Link to dataset
Figure 2	metabric_pam50_zscores_pam50_vs_tdasignatures.csv	.csv	GitHub	http://github.com/jimmymathews/tda-pam50-data
	metabric_mapper_on_pam50_location_key.png	.png	GitHub	http://github.com/jimmymathews/tda-pam50-data
	data_mRNA_median_Zscores.txt	.txt	GitHub	https://github.com/cBioPortal/datahub/blob/master/public/brca_metabric/data_mRNA_median_Zscores.txt
Figure 3	tcga_recurrence_pam50_vs_tdasignatures.csv	.csv	GitHub	http://github.com/jimmymathews/tda-pam50-data
	metabric_survival_pam50_vs_tdasignatures.csv	.csv	GitHub	http://github.com/jimmymathews/tda-pam50-data
	data_bcr_clinical_data_patient.txt	.txt	GitHub	https://github.com/cBioPortal/datahub/blob/master/public/brca_tcga/data_bcr_clinical_data_patient.txt
	data_clinical_patient.txt	.txt	GitHub	https://github.com/cBioPortal/datahub/blob/master/public/brca_metabric/data_clinical_patient.txt
Figure 4	metabric_survival_pam50_vs_tdasignatures.csv	.csv	GitHub	http://github.com/jimmymathews/tda-pam50-data
Figure 5	gtex_pam50_zscores_grouped_by_mapper_on_pam50.csv	.csv	GitHub	http://github.com/jimmymathews/tda-pam50-data
	gtex_santagata_markers_zscores_grouped_by_mapper_on_pam50.csv	.csv	GitHub	http://github.com/jimmymathews/tda-pam50-data
	GTEx_Analysis_2016-01-15_v7_RNASeQCv1.1.8_gene_tpm.gct.gz	.gct	GTEx portal	https://gtexportal.org/home/datasets
Figure 6	metabric_survival_pam50_vs_tdasignatures.csv	.csv	GitHub	http://github.com/jimmymathews/tda-pam50-data
Figure 7	metabric_pam50_zscores_grouped_by_mapper_on_pam50.csv	.csv	GitHub	http://github.com/jimmymathews/tda-pam50-data
	metabric_mapper_on_pam50_location_key.png	.png	GitHub	http://github.com/jimmymathews/tda-pam50-data
Table 1	pam50_gene_groups.csv	.csv	GitHub	http://github.com/jimmymathews/tda-pam50-data
